# Supplementary material for: Antifungal Effect of Polygodial on Botrytis cinerea, a Fungal Pathogen Affecting Table Grapes
Source: PubMed Central journal article supplement (PMC5713221; doi:10.3390/ijms18112251), 2017-10-27
Supplement: ijms-18-02251-s001.pdf [file ijms-18-02251-s001.pdf]

# Supplementary Material: Antifungal Effect of Polygodial on *Botrytis cinerea*, a Fungal Pathogen Affecting Table Grapes

Héctor Carrasco, Christian Robles-Kelly, Julia Rubio, Andrés F. Olea, Rolando Martínez and Evelyn Silva-Moreno

Table 1. Primers and their amplification efficiency

| Primer       |         | Sequence (5'-3')           | T <sub>m</sub> , °C | qPCR Efficiency |
|--------------|---------|----------------------------|---------------------|-----------------|
| <i>bchex</i> | Forward | tctacttcaacgaggcttc        | 57                  | 99              |
|              | Reverse | caccagattgaccgaaac         |                     |                 |
| <i>bcnma</i> | Forward | atgatcggcaccaacggcgt       | 57                  | 98              |
|              | Reverse | caaaggtcgatcgagtggcaa      |                     |                 |
| <i>cas-1</i> | Forward | atggaggctatggagcacca       | 57                  | 99              |
|              | Reverse | gcaacaccgctcatatcacct      |                     |                 |
| <i>bcaox</i> | Forward | tgcattgtactgcacctacaccatcg | 57                  | 100             |
|              | Reverse | gacgcgatcggaaaaatctcg      |                     |                 |
| <i>ubce</i>  | Forward | catcaactccaacggaagca       | 57                  | 100             |
|              | Reverse | tcggtcggcttctgtaaacgt      |                     |                 |
